# Supplementary material for: Thermo-photo catalytic CO2 hydrogenation over Ru/TiO2
Source: Royal Society of Chemistry journal article supplement (doi:10.1039/c9ta13275a), 2020-01-01
Supplement: c9ta13275a1.pdf [file c9ta13275a1.pdf]

## Supporting information

# Thermo-photo catalytic CO<sub>2</sub> hydrogenation over Ru/TiO<sub>2</sub>

*Chunling Wang,<sup>†,‡,§</sup> Siyuan Fang,<sup>‡</sup> Songhai Xie,<sup>||</sup> Ying Zheng,<sup>\*,§</sup> Yun Hang Hu<sup>\*,‡</sup>*

<sup>†</sup> School of Environmental Science and Engineering, Shanghai Jiao Tong University, Shanghai 200240, China

<sup>‡</sup> Department of Materials Science and Engineering, Michigan Technological University, Houghton, MI 49931-1295, USA E-mail: yunhangh@mtu.edu

<sup>§</sup> Department of Chemical and Biochemical Engineering, Western University, London, Ontario, N6A 3K7, Canada

<sup>||</sup> Department of Chemistry, Fudan University, Shanghai, 200433, China

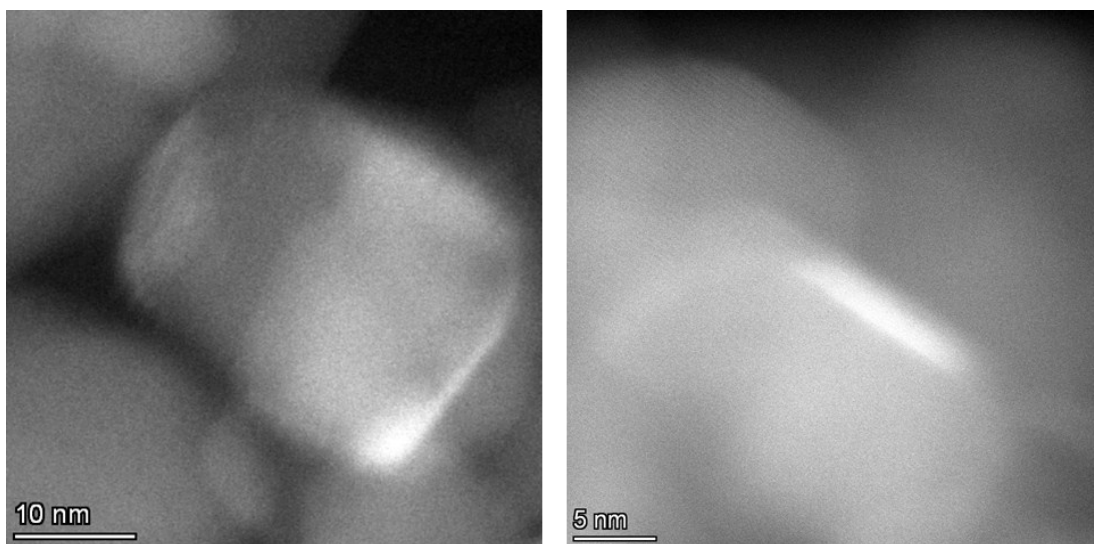

**Figure S1.** HAADF-STEM images of Ru/TiO<sub>2</sub>

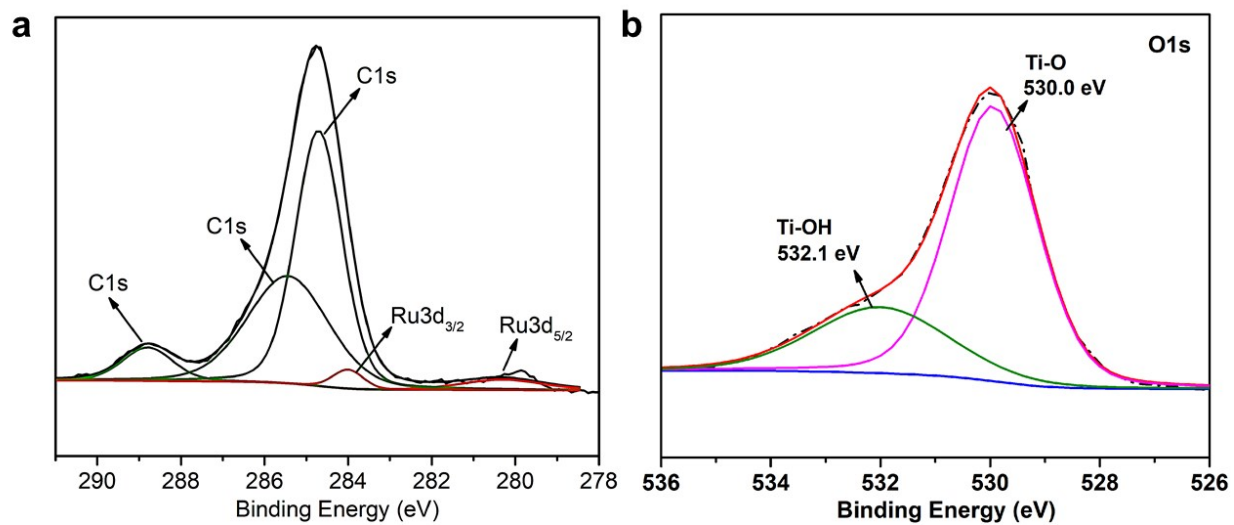

**Figure S2.** XPS spectra of (a) C1s and Ru3d and (b) O1s for Ru/TiO<sub>2</sub> sample.

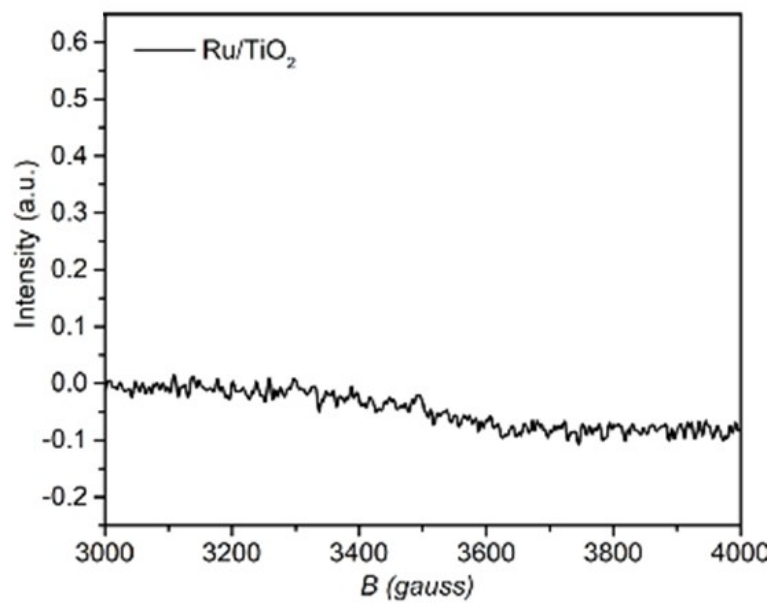

**Figure S3.** Electron paramagnetic resonance (EPR) spectra of Ru/TiO<sub>2</sub>.

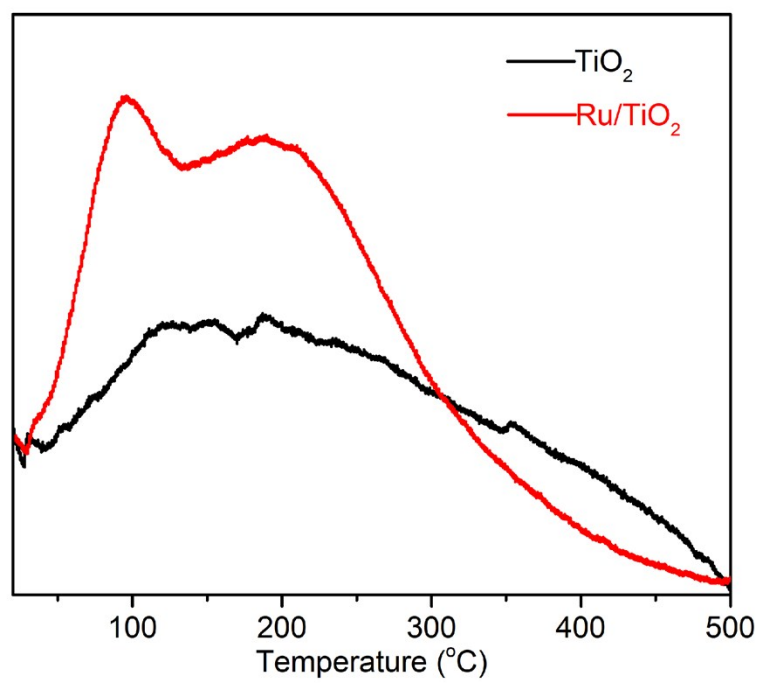

**Figure S4.** CO<sub>2</sub>-TPD for TiO<sub>2</sub> and Ru/TiO<sub>2</sub>

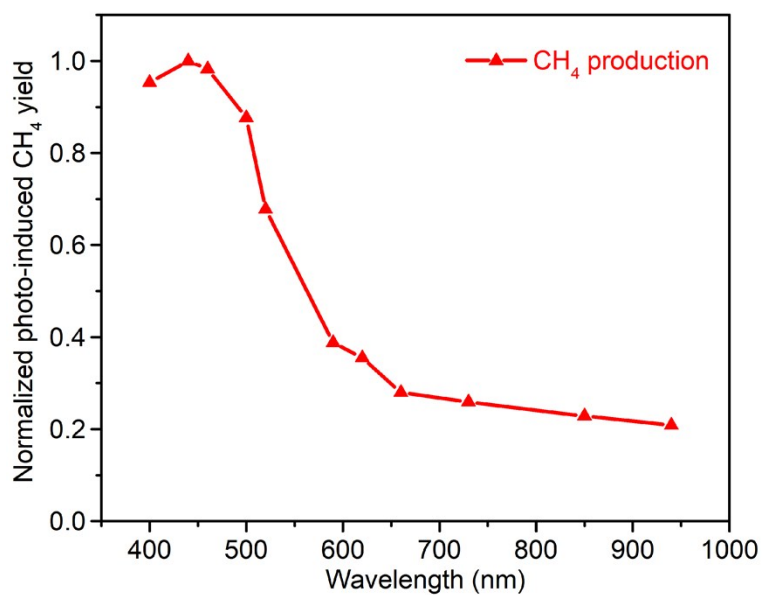

**Figure S5.** Normalized photo-induced CH<sub>4</sub> yield vs. wavelength of incident light for CO<sub>2</sub> hydrogenation (single-wavelength LED lights were used; temperature: 300 °C; CO<sub>2</sub>/H<sub>2</sub> = 1:3, flow rate 10ml/min; and 15 mg catalyst).

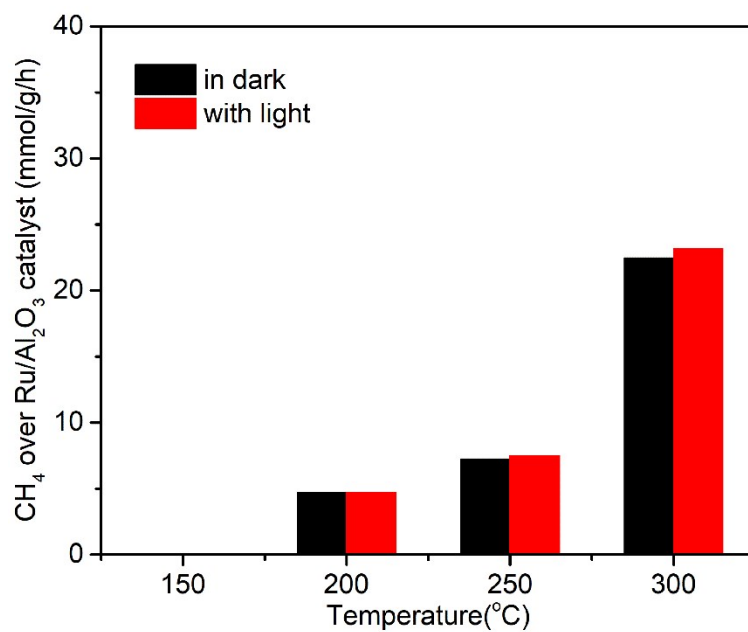

**Figure S6.** Thermo-catalytic (black bar) and thermo-photo catalytic (red bar) over Ru/Al<sub>2</sub>O<sub>3</sub> catalyst for CO<sub>2</sub> reduction with H<sub>2</sub> at various temperatures

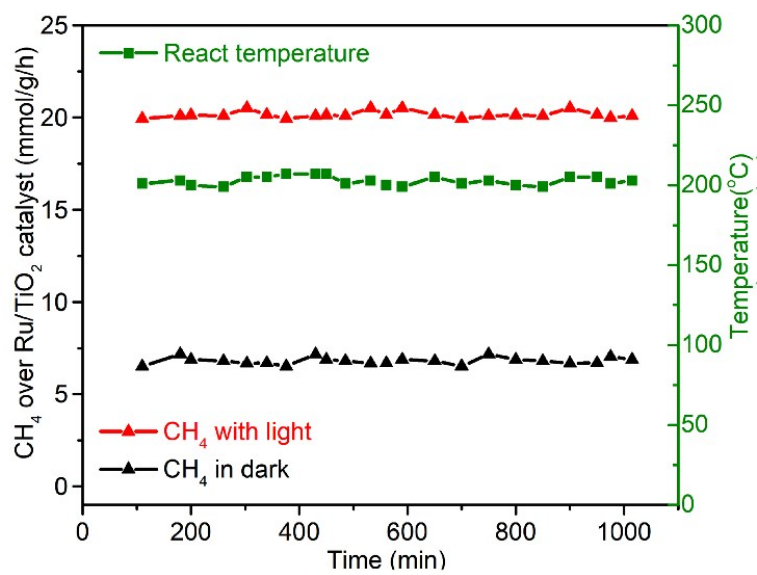

**Figure S7.** Time-resolved  $\text{CH}_4$  production over Ru/TiO<sub>2</sub> catalyst at 200°C in dark (black line) and under simulated AM 1.5G sunlight irradiation (red line)



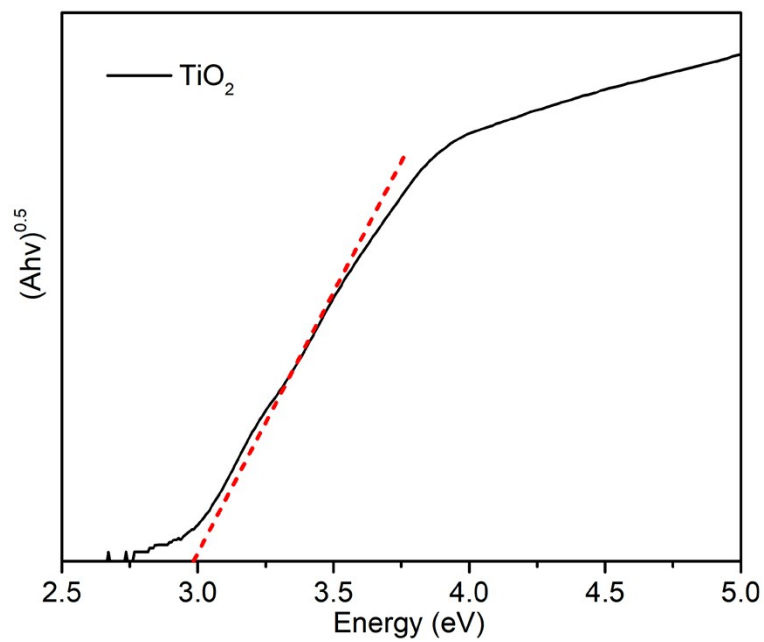

**Figure S8.** The band gap of  $\text{TiO}_2$  estimated via the Kubelka-Munk equation

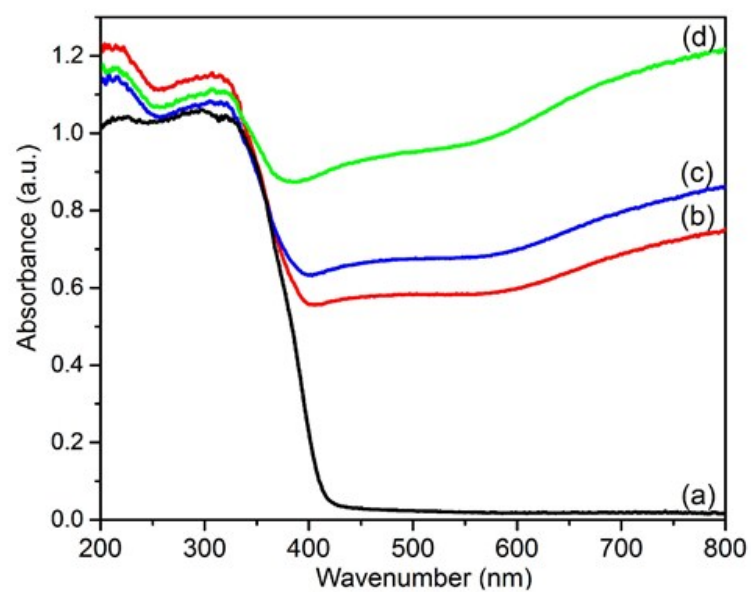

**Figure S9.** Diffuse reflectance UV-visible absorption spectra of fresh samples of (a) TiO<sub>2</sub>; (b) 0.2Ru/TiO<sub>2</sub>; (c) 1Ru/TiO<sub>2</sub>; (d) 4Ru/TiO<sub>2</sub>.

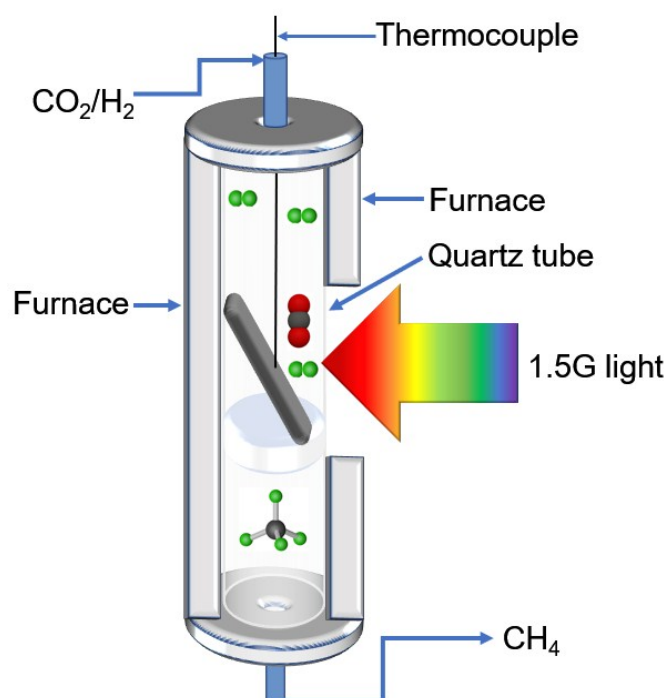

**Figure S10.** Scheme of the fixed bed reactor for photocatalytic reaction.

**Table S1** Elemental statistics according to EDS analysis for Ru/TiO<sub>2</sub> catalyst.

| Element | Line Type | k Factor | k Factor type | Absorption Correction | Wt%    | Wt% Sigma | Atomic % |
|---------|-----------|----------|---------------|-----------------------|--------|-----------|----------|
| O       | K series  | 1.165    |               | 1.00                  | 44.65  | 0.19      | 70.80    |
| Ti      | K series  | 0.635    |               | 1.00                  | 54.92  | 0.19      | 29.09    |
| Ru      | L series  | 1.052    |               | 1.00                  | 0.42   | 0.09      | 0.11     |
| Total:  |           |          |               |                       | 100.00 |           | 100.00   |

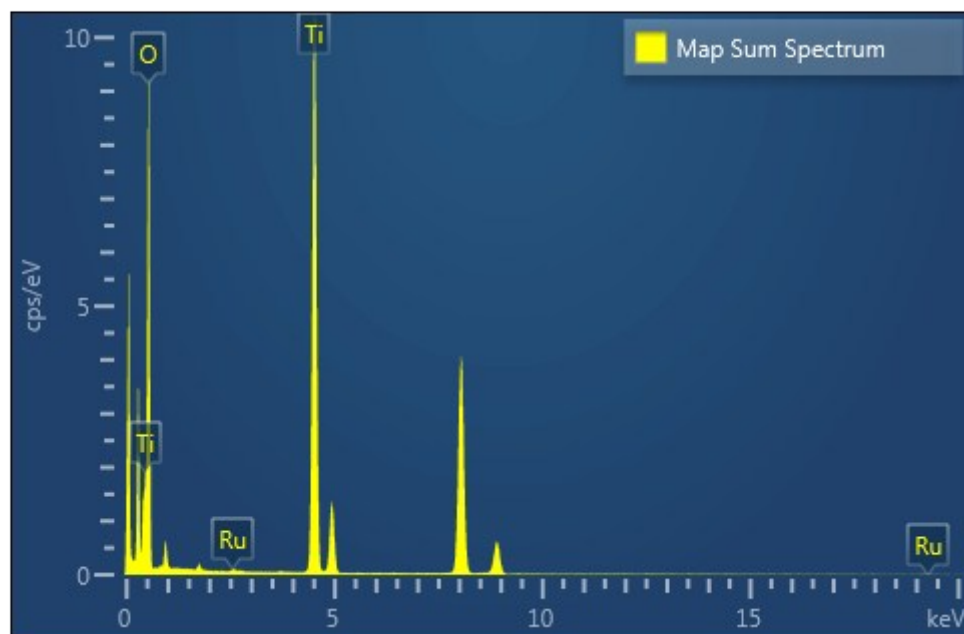

**Figure S11.** Elemental statistics according to EDS analysis for Ru/TiO<sub>2</sub> catalyst.
